# Supplementary material
Source: PubMed Central journal article supplement (PMC5635916)
Supplement: pnas.1711283114.sapp.pdf [file pnas.1711283114.sapp.pdf]

## Su and Freudenreich, Supplementary Figures

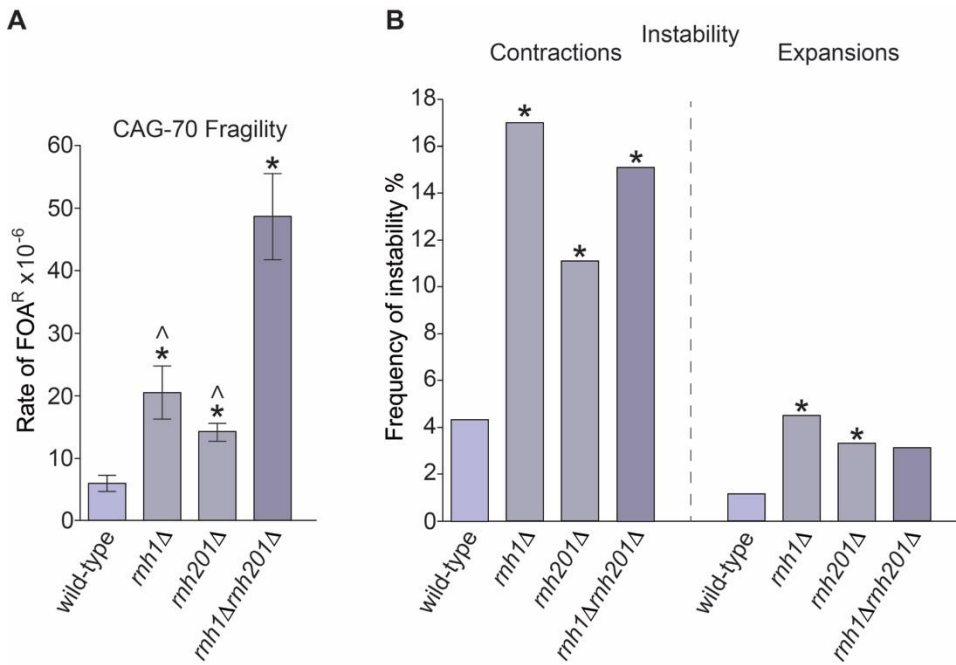

**Figure S1. RNase H1 and RNase H2 single mutant phenotypes.** (A) Rate of FOAR x 10<sup>-6</sup> in indicated mutants; \*p<0.05 compared to wild-type, ^p<0.05 compared to *rnh1Δrnh201Δ*, by *t* test. Average of at least 3 experiments +/- SEM is shown (see also Table S1). (B) CAG-70 expansion and contraction frequencies in indicated mutants, \*p<0.05 compared to wild-type, no statistical significance of single mutants compared to *rnh1Δrnh201Δ* was detected, by Fisher's exact test (see also Table S4).

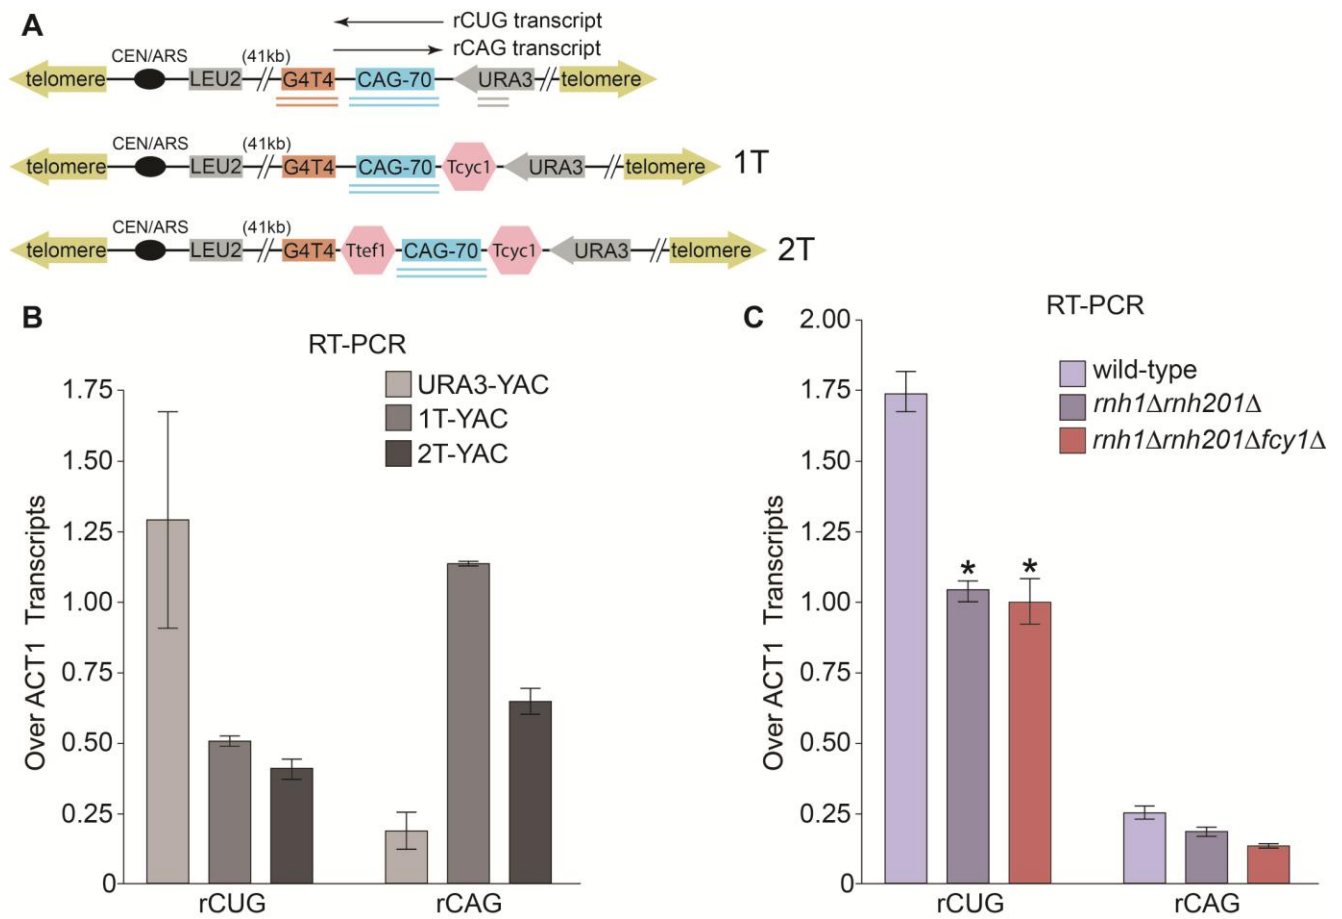

**Figure S2. Determination of transcription through CAG repeats by reverse transcription (RT)-PCR, shows decreased *URA3* read-through transcription levels after terminator addition.** (A) Scheme of different YACs. *URA3* transcription direction is indicated by the arrow. rCUG, CUG repeat RNA from *URA3* read-through transcription (there is 198 bp and no detected terminator in between *URA3* and CAG); rCAG, CAG repeat RNA from cryptic transcription from left side of CAG-70 repeats. Results using the *URA3*-YAC and 2 terminator (2T)-YAC are shown in main Figure 1. Double underlines indicate the qPCR amplicons used in the RT-PCR, DRIP, and ChIP experiments. (B) and (C) Quantitative PCR signals were normalized to the RNA signal from an actively transcribed gene *ACT1*. Each bar represents the mean of two experiments from two independent biological replicates +/-SEM.

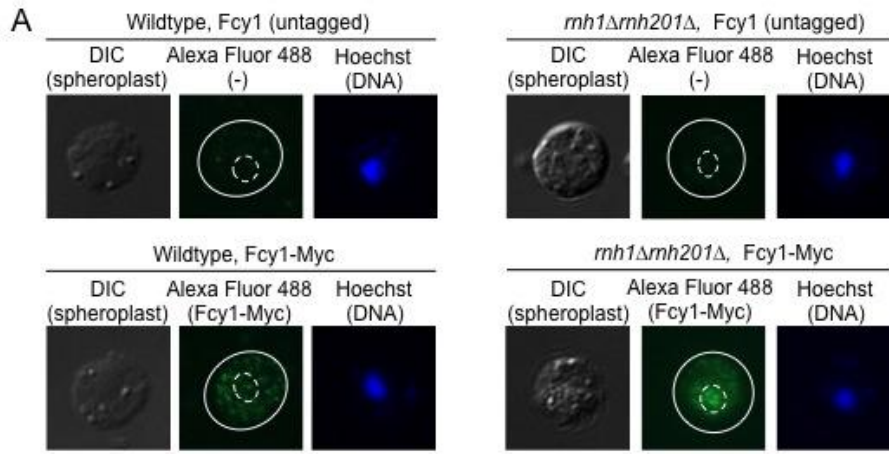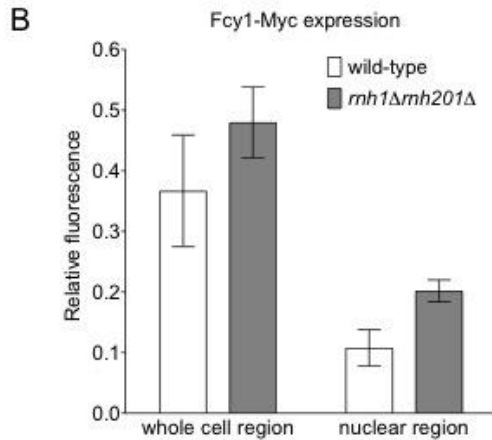

**Figure S3. Fcy1 nuclear expression increases in the absence of RNase H Enzymes.** (A) Immunofluorescent staining in indicated strains. Mouse anti-Myc (9E10) was detected with Alex Fluor 488 conjugated anti-mouse antibody. The fluorescent signal in green was detected and quantified with a Zeiss microscope and Zen software. A white solid circle outlines the spheroplast periphery according to the DIC picture on the left, and a white dashed circle outlines the nuclear region according to the Hoechst staining of nuclear DNA in blue. (B) Quantification of relative fluorescence in the indicated strains with Fcy1-expression is expressed as a ratio of Alexa Fluor over Hoechst intensity, with background subtracted. Seven wild-type spheroplasts and eight *rnh1Δrnh201Δ* spheroplasts were evaluated.

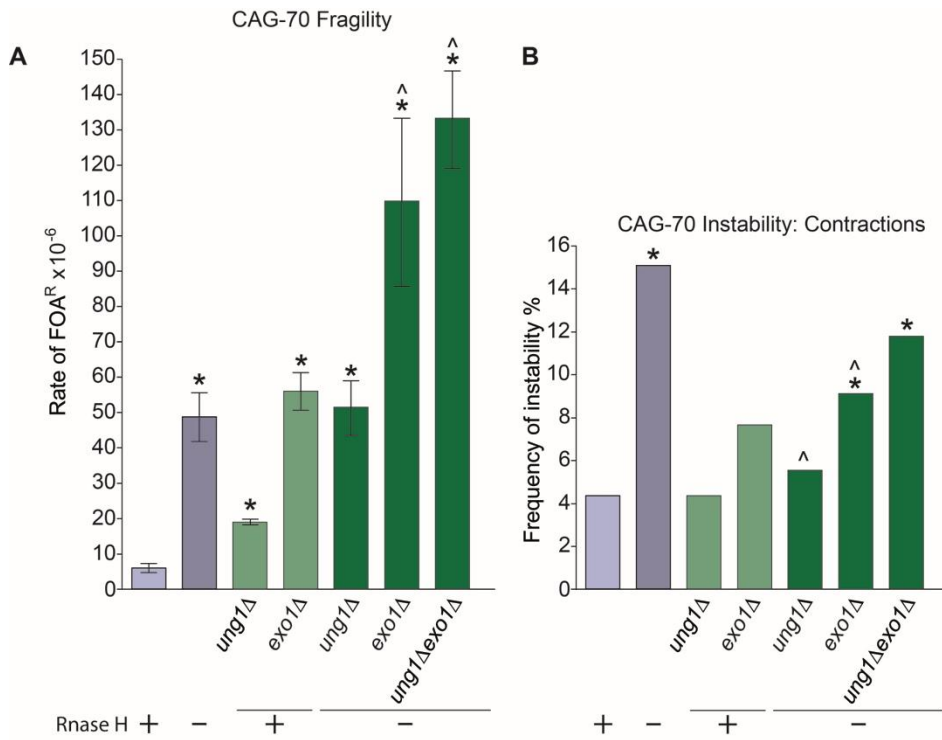

**Figure S4. Deletion of Exo1 in the *rnh1Δrnh201Δ* strain exhibits an additive increase in CAG repeat fragility, but a suppression of contractions.** (A) Rate of FOA<sup>R</sup> x 10<sup>-6</sup> in indicated mutants; \*p<0.05 compared to wild-type, ^p<0.05 compared to *rnh1Δrnh201Δ*, by *t* test. Average of at least 3 experiments +/- SEM is shown (see also Table S1). (B) CAG-70 contraction frequencies in indicated mutants, \*p<0.05 compared to wild-type, ^p<0.05 compared to *rnh1Δrnh201Δ*, by Fisher's exact test (see also Table S4).

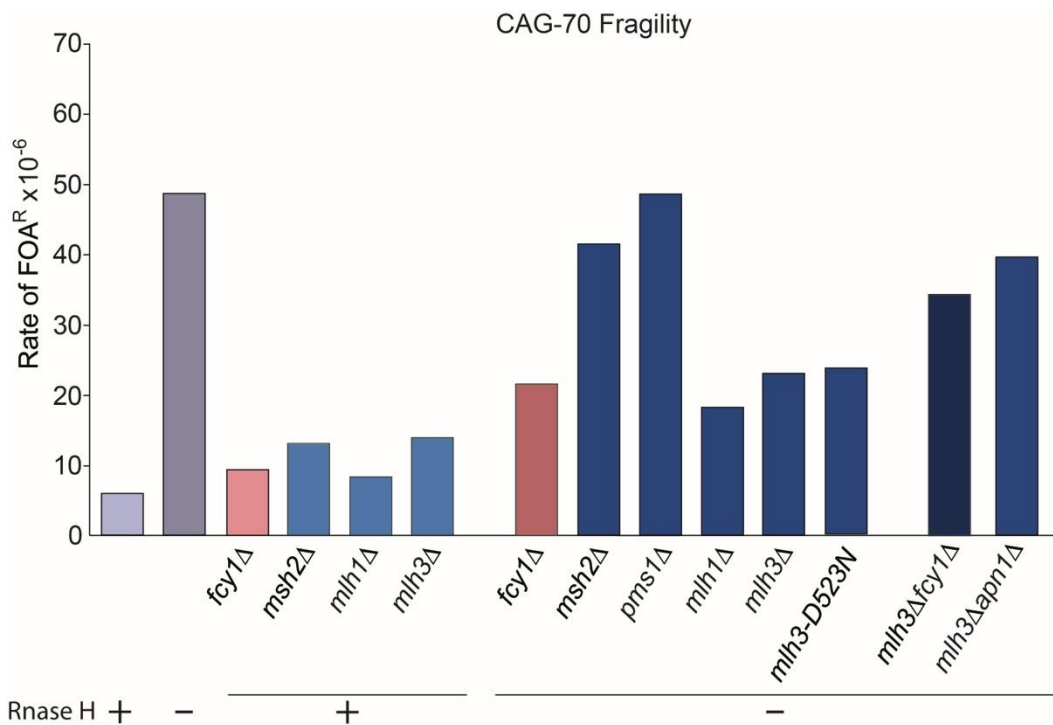

**Figure S5. CAG-70 fragility in MMR-defective mutants; data adjusted to only show FOA<sup>R</sup> due to YAC end loss.** The rates of FOA<sup>R</sup> for the indicated strains (Table S1) were adjusted by the percentage of loss of *URA3*, as assessed by PCR analysis (Table S5) to account for the higher rate of point mutations in some of the MMR-defective strains. The trends and conclusions remain the same with or without this adjustment.

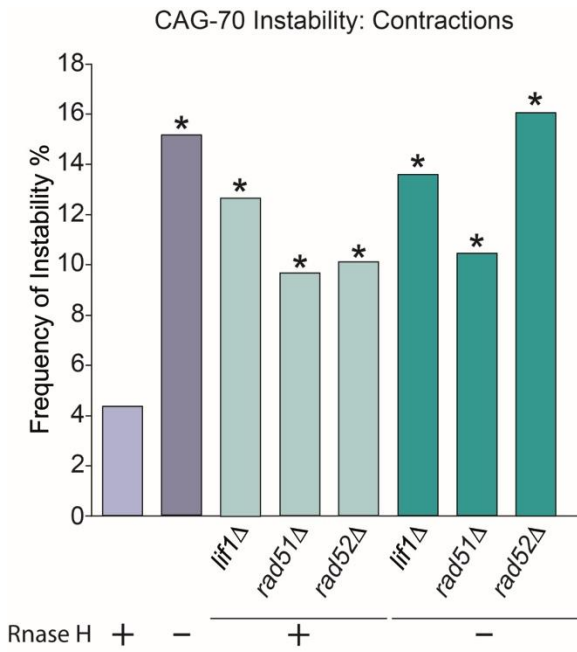

**Figure S6. HR or NHEJ repair is not the primary cause of R-loop-induced CAG repeat contractions.** CAG-70 contraction frequencies in indicated mutants, \* $p < 0.05$  compared to wild-type, no statistical significance compared to *rnh1*Δ*rnh201*Δ was detected, by Fisher's exact test (see also Table S4).

Su and Freudenreich, Supplementary Tables

Supplementary Table 1. Fragility analysis of CAG-70 repeats on the URA3-YAC

| Strains                                | Rate of FOA <sup>R</sup><br>(X10 <sup>-6</sup> )<br>± <i>S.E.M</i> | Fold<br>over<br>wt | No. of<br>Assays | p-value<br>to wt     | p-value<br>to <i>rnh1Δ</i><br><i>rnh201Δ</i> | other p-values                                                                                                                                                       |
|----------------------------------------|--------------------------------------------------------------------|--------------------|------------------|----------------------|----------------------------------------------|----------------------------------------------------------------------------------------------------------------------------------------------------------------------|
| wild-type <sup>1</sup>                 | 6.0 ±1.3                                                           | -                  | 3                | -                    | -                                            | -                                                                                                                                                                    |
| <i>rnh1Δ</i>                           | 20.4 ±4.4                                                          | 3.4                | 3                | 0.03                 | 0.03                                         | -                                                                                                                                                                    |
| <i>rnh201Δ</i>                         | 14.1 ±1.4                                                          | 2.4                | 3                | 0.01                 | 8.0 X10 <sup>-3</sup>                        | -                                                                                                                                                                    |
| <i>rnh1Δrnh201Δ</i>                    | 48.7 ±6.9                                                          | 8.1                | 3                | 3.7X10 <sup>-3</sup> | -                                            | -                                                                                                                                                                    |
| <b>cytosine/cytidine<br/>deaminase</b> |                                                                    |                    |                  |                      |                                              | a, to <i>fcy1Δ</i><br>b, to <i>cdd1Δ</i>                                                                                                                             |
| <i>fcy1Δ</i>                           | 9.4±2.5                                                            | 1.6                | 3                | 0.28                 | -                                            | -                                                                                                                                                                    |
| <i>cdd1Δ</i>                           | 18.5±5.9                                                           | 3.1                | 3                | 0.11                 | -                                            | -                                                                                                                                                                    |
| <i>rnh1Δrnh201Δfcy1Δ</i>               | 21.6±2.6                                                           | 3.6                | 3                | 5.8X10 <sup>-3</sup> | 0.02                                         | 0.03 <sup>a</sup>                                                                                                                                                    |
| <i>rnh1Δrnh201Δcdd1Δ</i>               | 50.6±3.9                                                           | 8.4                | 3                | 4.0X10 <sup>-4</sup> | 0.83                                         | 0.01 <sup>b</sup>                                                                                                                                                    |
| <b>BER genes</b>                       |                                                                    |                    |                  |                      |                                              | c, to <i>ung1Δ</i><br>d, to <i>apn1Δ</i><br>e, to <i>exo1Δ</i>                                                                                                       |
| <i>ung1Δ</i>                           | 19.0±0.6                                                           | 3.2                | 3                | 8.0X10 <sup>-4</sup> | -                                            | -                                                                                                                                                                    |
| <i>apn1Δ</i>                           | 11.5±1.3                                                           | 1.9                | 4                | 0.03                 | -                                            | -                                                                                                                                                                    |
| <i>exo1Δ</i>                           | 55.8±5.2                                                           | 9.3                | 3                | 8.0X10 <sup>-4</sup> | -                                            | -                                                                                                                                                                    |
| <i>rnh1Δrnh201Δung1Δ</i>               | 50.9±7.4                                                           | 8.5                | 3                | 4.0X10 <sup>-3</sup> | 0.84                                         | 0.01 <sup>c</sup>                                                                                                                                                    |
| <i>rnh1Δrnh201Δapn1Δ</i>               | 60.6±5.4                                                           | 10.1               | 3                | 6.0X10 <sup>-4</sup> | 0.24                                         | 1.0X10 <sup>-4d</sup>                                                                                                                                                |
| <i>rnh1Δrnh201Δexo1Δ</i>               | 112.2±13.5                                                         | 18.7               | 3                | 1.4X10 <sup>-3</sup> | 0.01                                         | 0.02 <sup>e</sup>                                                                                                                                                    |
| <i>rnh1Δrnh201Δung1Δapn1Δ</i>          | 56.8±7.7                                                           | 9.5                | 3                | 2.9X10 <sup>-3</sup> | 0.48                                         | 8.3X10 <sup>-3c</sup><br>1.1X10 <sup>-3d</sup>                                                                                                                       |
| <i>rnh1Δrnh201Δung1Δexo1Δ</i>          | 108.9±13.5                                                         | 18.2               | 3                | 1.6X10 <sup>-3</sup> | 0.02                                         | 2.7X10 <sup>-3c</sup><br>0.02 <sup>e</sup>                                                                                                                           |
| <b>NER genes</b>                       |                                                                    |                    |                  |                      |                                              | k, to <i>rad1Δ</i><br>l, to <i>rad2Δ</i><br>m, to <i>rad14Δ</i><br>n, to <i>rad26Δ</i><br>o, to <i>rad1Δrad2Δ</i>                                                    |
| <i>rad1Δ</i>                           | 6.9±0.7                                                            | 1.2                | 3                | 0.56                 | -                                            | -                                                                                                                                                                    |
| <i>rad2Δ</i>                           | 19.9±3.0                                                           | 3.3                | 3                | 0.01                 | -                                            | -                                                                                                                                                                    |
| <i>rad14Δ</i>                          | 21.1±3.2                                                           | 3.5                | 4                | 0.08                 | -                                            | -                                                                                                                                                                    |
| <i>rad26Δ</i>                          | 14.1±1.1                                                           | 2.4                | 3                | 9.4X10 <sup>-3</sup> | -                                            | -                                                                                                                                                                    |
| <i>rad1Δrad2Δ</i>                      | 18.5±5.6                                                           | 3.1                | 3                | 0.09                 | -                                            | 0.11 <sup>k</sup><br>0.83 <sup>l</sup>                                                                                                                               |
| <i>rnh1Δrnh201Δrad1Δ</i>               | 48.5±3.5                                                           | 8.1                | 3                | 3.0X10 <sup>-4</sup> | 0.98                                         | 3.0X10 <sup>-4k</sup>                                                                                                                                                |
| <i>rnh1Δrnh201Δrad2Δ</i>               | 65.4±9.4                                                           | 10.9               | 3                | 3.3X10 <sup>-3</sup> | 0.23                                         | 0.01 <sup>l</sup>                                                                                                                                                    |
| <i>rnh1Δrnh201Δrad14Δ</i>              | 79.4±4.0                                                           | 13.2               | 3                | 1.0X10 <sup>-4</sup> | 0.02                                         | 2.0X10 <sup>-4m</sup>                                                                                                                                                |
| <i>rnh1Δrnh201Δrad26Δ</i>              | 46.1±3.6                                                           | 7.7                | 3                | 5.0X10 <sup>-4</sup> | 0.97                                         | 1.1X10 <sup>-3n</sup>                                                                                                                                                |
| <i>rnh1Δrnh201Δrad1Δrad2Δ</i>          | 37.3±5.71                                                          | 6.2                | 3                | 5.9X10 <sup>-3</sup> | 0.27                                         | 0.08 <sup>o</sup>                                                                                                                                                    |
| <b>MMR genes</b>                       |                                                                    |                    |                  |                      |                                              | f, to <i>mlh1Δ</i><br>g, to <i>mlh3Δ</i><br>h, to <i>msh2Δ</i><br>i, to <i>pms1Δ</i><br>j, to <i>mlh1Δmlh3Δ</i><br>z, to<br><i>rnh1Δrnh201ΔMLH3-wt</i><br><i>SK1</i> |
| <i>msh2Δ</i>                           | 17.4±2.2                                                           | 2.9                | 3                | 0.01                 | -                                            | -                                                                                                                                                                    |

|                                 |            |      |   |                      |                      |                                                                  |
|---------------------------------|------------|------|---|----------------------|----------------------|------------------------------------------------------------------|
| <i>pms1Δ</i>                    | 18.1±2.0   | 3.0  | 3 | 6.8X10 <sup>-3</sup> | -                    | -                                                                |
| <i>mlh1Δ</i>                    | 11.2±2.2   | 1.9  | 4 | 0.12                 | -                    | -                                                                |
| <i>mlh3Δ</i>                    | 15.4±2.3   | 2.6  | 3 | 0.03                 | -                    | -                                                                |
| <i>mlh1Δmlh3Δ</i>               | 13.1±3.0   | 2.2  | 3 | 0.09                 | -                    | 0.61 <sup>f</sup><br>0.58 <sup>g</sup>                           |
| <i>rnh1Δrnh201Δmsh2Δ</i>        | 45.8±4.2   | 7.6  | 5 | 4.0X10 <sup>-4</sup> | 0.71                 | 2.7X10 <sup>-3h</sup>                                            |
| <i>rnh1Δrnh201Δpms1Δ</i>        | 50.4±9.6   | 8.4  | 3 | 0.01                 | 0.89                 | 0.03 <sup>i</sup>                                                |
| <i>rnh1Δrnh201Δmlh1Δ</i>        | 23.2±1.6   | 3.9  | 5 | 3.0X10 <sup>-4</sup> | 3.4X10 <sup>-3</sup> | 2.5X10 <sup>-3f</sup>                                            |
| <i>rnh1Δrnh201Δmlh3Δ</i>        | 23.7±5.4   | 4.0  | 4 | 0.04                 | 0.03                 | 0.27 <sup>g</sup>                                                |
| <i>rnh1Δrnh201Δmlh3-D523N</i>   | 23.8±2.0   | 4.0  | 3 | 1.7X10 <sup>-3</sup> | 0.03                 | 1.9X10 <sup>-3z</sup>                                            |
| <i>rnh1Δrnh201ΔMLH3-wt(SK1)</i> | 42.3±1.6   | 7.1  | 3 | 1.0X10 <sup>-4</sup> | 0.42                 | -                                                                |
| <i>rnh1Δrnh201Δmlh1Δmlh3Δ</i>   | 30.7±9.4   | 5.1  | 3 | 0.06                 | 0.19                 | 0.15 <sup>j</sup>                                                |
| <i>rnh1Δrnh201Δmlh1Δfcy1Δ</i>   | 38.3±1.7   | 6.4  | 3 | 1.0X10 <sup>-4</sup> | 0.22                 | 3.0X10 <sup>-4f</sup><br>7.0X10 <sup>-4a</sup>                   |
| <i>rnh1Δrnh201Δmlh1Δapn1Δ</i>   | 23.1±1.8   | 3.9  | 3 | 1.5X10 <sup>-3</sup> | 0.02                 | 0.01 <sup>f</sup><br>3.3X10 <sup>-3d</sup>                       |
| <i>rnh1Δrnh201Δmlh3Δfcy1Δ</i>   | 34.3±2.6   | 5.7  | 3 | 6.0X10 <sup>-4</sup> | 0.12                 | 5.4X10 <sup>-3g</sup><br>2.4X10 <sup>-3a</sup>                   |
| <i>rnh1Δrnh201Δmlh3Δapn1Δ</i>   | 39.9±5.6   | 6.7  | 3 | 4.1X10 <sup>-3</sup> | 0.38                 | 0.02 <sup>g</sup><br>2.3X10 <sup>-3d</sup>                       |
| <b>NHEJ/HR/SSA genes</b>        |            |      |   |                      |                      | p, to <i>lif1Δ</i><br>q, to <i>rad51Δ</i><br>r, to <i>rad52Δ</i> |
| <i>lif1Δ</i>                    | 12.3±0.4   | 2.1  | 3 | 0.01                 | -                    | -                                                                |
| <i>rad51Δ<sup>2</sup></i>       | 25.8±5.2   | 4.3  | 4 | 0.28                 | -                    | -                                                                |
| <i>rad52Δ<sup>2</sup></i>       | 25.3±6.7   | 4.2  | 4 | 0.10                 | -                    | -                                                                |
| <i>rnh1Δrnh201Δlif1Δ</i>        | 50.2±8.4   | 7.9  | 3 | 8.7X10 <sup>-3</sup> | 0.90                 | 0.01 <sup>p</sup>                                                |
| <i>rnh1Δrnh201Δrad51Δ</i>       | 44.4±3.8   | 7.4  | 3 | 6.0X10 <sup>-4</sup> | 0.62                 | 0.24 <sup>q</sup>                                                |
| <i>rnh1Δrnh201Δrad52Δ</i>       | 113.0±17.7 | 18.8 | 3 | 2.0X10 <sup>-3</sup> | 0.01                 | 1.4X10 <sup>-3r</sup>                                            |

1, wild-type data are from (1). 2, data from (2). S.E.M: standard error of mean; Statistics by *t* test.

### Supplementary Table 2. Fragility analysis of no tract (CAG-0) on the URA3-YAC

| Strains                                | Rate of FOA <sup>R</sup><br>(X10 <sup>-6</sup> )<br>± S.E.M | Fold<br>over<br>wt | No. of<br>Assays | p-value<br>to wt     | p-value to<br><i>rnh1Δrnh201</i><br><i>Δ</i> | other p-values<br>z, to <i>rnh1Δrnh201Δ</i> ,<br>CAG-70 URA3-YAC |
|----------------------------------------|-------------------------------------------------------------|--------------------|------------------|----------------------|----------------------------------------------|------------------------------------------------------------------|
| wild-type <sup>1</sup>                 | 2.2±0.5                                                     | -                  | 3                | -                    | -                                            | -                                                                |
| <i>rnh1Δrnh201Δ</i>                    | 13.1±1.3                                                    | 6.0                | 6                | 1.9X10 <sup>-3</sup> | -                                            | 2.0X10 <sup>-4z</sup>                                            |
| <b>cytosine/cytidine<br/>deaminase</b> |                                                             |                    |                  |                      |                                              | a, to <i>fcy1Δ</i>                                               |
| <i>fcy1Δ</i>                           | 4.2±1.6                                                     | 1.8                | 4                | 0.36                 | -                                            | -                                                                |
| <i>rnh1Δrnh201Δfcy1Δ</i>               | 8.7                                                         | 4.0                | 3                | 0.15                 | 0.18                                         | 0.27 <sup>a</sup>                                                |

1, wild-type data are from (1). S.E.M: standard error of mean; Statistics by *t* test.



**Supplementary Table 3.** Fragility analysis of CAG-70 repeats on the terminator-YACs

| Strains             | Terminator number | Rate of FOA <sup>R</sup> (X10 <sup>-6</sup> ) ± S.E.M | Fold over wt | No. of Assays | p-value to wt, same YAC | p-value to URA3-YAC |
|---------------------|-------------------|-------------------------------------------------------|--------------|---------------|-------------------------|---------------------|
| wild-type           | 1T                | 2.6±0.8                                               | -            | 4             | -                       | 0.07                |
| <i>rnh1Δrnh201Δ</i> | 1T                | 20.4±3.1                                              | 7.8          | 3             | 0.01                    | 0.02                |
| wild-type           | 2T                | 3.5±0.8                                               | -            | 4             | -                       | 0.15                |
| <i>rnh1Δrnh201Δ</i> | 2T                | 22.3±3.3                                              | 6.4          | 3             | 5.7X10 <sup>-3</sup>    | 0.03                |

S.E.M: standard error of mean; Statistics by *t* test.

**Supplementary Table 4.** Instability analysis of the CAG-70 repeat tract on the URA3-YAC (or terminator-YACs if specified)

| Strains                                 | Total rxns. | Contractions |      |              |                      |                                                                | Expansions |     |              |                       |                                                                |
|-----------------------------------------|-------------|--------------|------|--------------|----------------------|----------------------------------------------------------------|------------|-----|--------------|-----------------------|----------------------------------------------------------------|
|                                         |             | #            | %    | Fold over wt | p-value to wt        | other p-values<br>y, to<br><i>rnh1Δrnh201Δ</i>                 | #          | %   | Fold over wt | p-value to wt         | other p-values<br>y, to<br><i>rnh1Δrnh201Δ</i>                 |
|                                         |             |              |      |              |                      |                                                                |            |     |              |                       |                                                                |
| wild-type <sup>1</sup>                  | 460         | 20           | 4.3  | -            | -                    | -                                                              | 5          | 1.1 | -            | -                     | -                                                              |
| wild-type 1T YAC <sup>3</sup>           | 236         | 15           | 6.4  | -            | -                    | 0.27 to wt, URA3-YAC                                           | 2          | 0.9 | -            | -                     | 1.0 to wt, URA3-YAC                                            |
| wild-type 2T YAC <sup>3</sup>           | 238         | 12           | 5.0  | -            | -                    | 0.70 to wt, URA3-YAC                                           | 3          | 1.3 |              | -                     | 0.70 to wt, URA3-YAC                                           |
| <i>rnh1Δ</i>                            | 156         | 25           | 16.0 | 3.7          | 1.0X10 <sup>-4</sup> | 0.88 <sup>y</sup>                                              | 7          | 4.5 | 4.1          | 7.7 X10 <sup>-3</sup> | 0.58 <sup>y</sup>                                              |
| <i>rnh201Δ</i>                          | 180         | 20           | 11.1 | 2.6          | 3.1X10 <sup>-3</sup> | 0.28 <sup>y</sup>                                              | 6          | 3.3 | 3.0          | 0.03                  | 1.0 <sup>y</sup>                                               |
| <i>rnh1Δrnh201Δ</i>                     | 192         | 29           | 15.1 | 3.5          | 1.0X10 <sup>-4</sup> | -                                                              | 6          | 3.1 | 2.8          | 0.07                  | -                                                              |
| <i>rnh1Δrnh201Δ</i> 1T YAC <sup>3</sup> | 76          | 6            | 7.9  | 1.2          | 0.61                 | 0.24 to <i>rnh1Δrnh201Δ</i> , URA3-YAC                         | 2          | 2.6 | 2.9          | 0.25                  | 0.26 to <i>rnh1Δrnh201Δ</i> , URA3-YAC                         |
| <i>rnh1Δrnh201Δ</i> 2T YAC <sup>3</sup> | 143         | 9            | 6.3  | 1.5          | 0.65                 | 0.01 to <i>rnh1Δrnh201Δ</i> , URA3-YAC                         | 3          | 2.1 | 1.9          | 0.40                  | 0.68 to <i>rnh1Δrnh201Δ</i> , URA3-YAC                         |
| <b>cytosine/cytidine deaminase</b>      |             |              |      |              |                      |                                                                |            |     |              |                       |                                                                |
| <i>fcy1Δ</i>                            | 192         | 13           | 6.8  | 1.6          | 0.24                 | a, to <i>fcy1Δ</i><br>b, to <i>cdd1Δ</i>                       | 2          | 1.0 | 0.9          | 1.0                   | a, to <i>fcy1Δ</i><br>b, to <i>cdd1Δ</i>                       |
| <i>cdd1Δ</i>                            | 143         | 11           | 7.7  | 1.8          | 0.13                 | -                                                              | 3          | 2.1 | 1.9          | 0.40                  | -                                                              |
| <i>rnh1Δrnh201Δ fcy1Δ</i>               | 125         | 6            | 4.8  | 1.1          | 0.81                 | 5.3X10 <sup>-3y</sup><br>0.63 <sup>a</sup>                     | 4          | 3.2 | 2.9          | 0.10                  | 1.0 <sup>y</sup><br>0.22 <sup>a</sup>                          |
| <i>rnh1Δrnh201Δ cdd1Δ</i>               | 146         | 16           | 11.0 | 2.5          | 7.6X10 <sup>-3</sup> | 0.33 <sup>y</sup><br>0.42 <sup>b</sup>                         | 4          | 2.7 | 2.5          | 0.23                  | 1.0 <sup>y</sup><br>1.0 <sup>b</sup>                           |
| <i>rnh1Δrnh201Δ fcy1Δcdd1Δ</i>          | 96          | 7            | 7.3  | 1.7          | 0.2919               | 0.06 <sup>y</sup><br>1.0 <sup>a</sup> , 1.0 <sup>b</sup>       | 3          | 3.1 | 2.8          | 0.14                  | 1.0 <sup>y</sup><br>0.3 <sup>a</sup> , 0.69 <sup>b</sup>       |
| <b>BER genes</b>                        |             |              |      |              |                      |                                                                |            |     |              |                       |                                                                |
| <i>ung1Δ</i>                            | 144         | 7            | 4.9  | 1.1          | 0.83                 | c, to <i>ung1Δ</i><br>d, to <i>apn1Δ</i><br>e, to <i>exo1Δ</i> | 5          | 3.5 | 3.2          | 0.06                  | c, to <i>ung1Δ</i><br>d, to <i>apn1Δ</i><br>e, to <i>exo1Δ</i> |
| <i>apn1Δ</i>                            | 144         | 11           | 7.6  | 1.8          | 0.13                 | -                                                              | 3          | 2.1 | 1.9          | 0.40                  | -                                                              |
| <i>exo1Δ</i>                            | 144         | 11           | 7.6  | 1.8          | 0.13                 | -                                                              | 1          | 0.7 | 0.6          | 1.0                   | -                                                              |
| <i>rnh1Δrnh201Δ ung1Δ</i>               | 144         | 8            | 5.6  | 1.3          | 0.50                 | 7.5X10 <sup>-3y</sup>                                          | 5          | 3.5 | 3.2          | 0.06                  | 1.0 <sup>y</sup>                                               |
| <i>rnh1Δrnh201Δ apn1Δ</i>               | 103         | 6            | 5.8  | 1.4          | 0.60                 | 0.02 <sup>y</sup>                                              | 2          | 1.9 | 1.8          | 0.62                  | 0.72 <sup>y</sup>                                              |
| <i>rnh1Δrnh201Δ exo1Δ</i>               | 142         | 13           | 9.2  | 2.1          | 0.03                 | 0.13 <sup>y</sup>                                              | 8          | 5.6 | 5.1          | 3.4X10 <sup>-3</sup>  | 0.28 <sup>y</sup>                                              |
| <i>rnh1Δrnh201Δ ung1Δapn1Δ</i>          | 111         | 6            | 5.4  | 1.3          | 0.61                 | 0.01 <sup>y</sup>                                              | 2          | 1.8 | 1.6          | 0.63                  | 0.71 <sup>y</sup>                                              |

|                                 |     |    |      |     |                      |                                                                                                                                                             |    |     |     |                      |                                                                                                                                                             |
|---------------------------------|-----|----|------|-----|----------------------|-------------------------------------------------------------------------------------------------------------------------------------------------------------|----|-----|-----|----------------------|-------------------------------------------------------------------------------------------------------------------------------------------------------------|
| <i>rnh1Δrnh201Δung1Δfcy1Δ</i>   | 47  | 4  | 8.5  | 2.0 | N/D                  | N/D                                                                                                                                                         | 2  | 4.3 | 3.9 | N/D                  | N/D                                                                                                                                                         |
| <i>rnh1Δrnh201Δung1Δexo1Δ</i>   | 144 | 17 | 11.8 | 2.7 | 2.3X10 <sup>-3</sup> | 0.43 <sup>y</sup>                                                                                                                                           | 3  | 2.1 | 1.9 | 0.40                 | 0.73 <sup>y</sup>                                                                                                                                           |
| <b>NER genes</b>                |     |    |      |     |                      | k, to <i>rad1Δ</i><br>l, to <i>rad2Δ</i><br>m, to <i>rad14Δ</i><br>n, to <i>rad26Δ</i><br>o, to <i>rad1Δrad2Δ</i>                                           |    |     |     |                      | k, to <i>rad1Δ</i><br>l, to <i>rad2Δ</i><br>m, to <i>rad14Δ</i><br>n, to <i>rad26Δ</i><br>o, to <i>rad1Δrad2Δ</i>                                           |
| <i>rad1Δ</i>                    | 144 | 11 | 7.6  | 1.8 | 0.04                 | -                                                                                                                                                           | 1  | 0.7 | 0.6 | 1.0                  | -                                                                                                                                                           |
| <i>rad2Δ</i>                    | 144 | 4  | 2.8  | 0.6 | 0.47                 | -                                                                                                                                                           | 2  | 1.4 | 1.3 | 0.63                 | -                                                                                                                                                           |
| <i>rad14Δ</i>                   | 153 | 13 | 8.5  | 2.0 | 0.06                 | -                                                                                                                                                           | 10 | 6.5 | 5.9 | 7.0X10 <sup>-4</sup> | -                                                                                                                                                           |
| <i>rad26Δ</i>                   | 80  | 7  | 8.8  | 2.0 | 0.10                 | -                                                                                                                                                           | 3  | 3.8 | 3.5 | 0.10                 | -                                                                                                                                                           |
| <i>rad1Δrad2Δ</i>               | 141 | 12 | 8.5  | 2.0 | 0.08                 | 0.83 <sup>k</sup> , 0.04 <sup>l</sup>                                                                                                                       | 4  | 2.8 | 2.6 | 0.23                 | 0.21 <sup>k</sup> , 0.44 <sup>l</sup>                                                                                                                       |
| <i>rnh1Δrnh201Δrad1Δ</i>        | 140 | 8  | 5.7  | 1.3 | 0.50                 | 7.7X10 <sup>-3y</sup><br>0.64 <sup>k</sup>                                                                                                                  | 4  | 2.9 | 2.6 | 0.22                 | 0.22 <sup>y</sup><br>0.64 <sup>k</sup>                                                                                                                      |
| <i>rnh1Δrnh201Δrad1Δapn1Δ</i>   | 112 | 8  | 7.1  | 1.6 | 0.22                 | 0.045 <sup>y</sup> , 1 <sup>k</sup><br>1 <sup>d</sup>                                                                                                       | 1  | 0.9 | 0.8 | 1                    | 0.27 <sup>y</sup> , 1 <sup>k</sup><br>0.63                                                                                                                  |
| <i>rnh1Δrnh201Δrad2Δ</i>        | 168 | 14 | 8.3  | 1.9 | 0.07                 | 0.05 <sup>y</sup><br>5.0X10 <sup>-3l</sup>                                                                                                                  | 5  | 3.0 | 2.7 | 0.14                 | 0.14 <sup>y</sup><br>0.6 <sup>l</sup>                                                                                                                       |
| <i>rnh1Δrnh201Δrad14Δ</i>       | 144 | 18 | 12.5 | 2.9 | 1.2X10 <sup>-3</sup> | 0.53 <sup>y</sup><br>0.34 <sup>m</sup>                                                                                                                      | 4  | 2.8 | 2.5 | 0.23                 | 0.23 <sup>y</sup><br>0.17 <sup>m</sup>                                                                                                                      |
| <i>rnh1Δrnh201Δrad26Δ</i>       | 91  | 10 | 11.0 | 2.5 | 0.02                 | 0.46 <sup>y</sup><br>1.0 <sup>n</sup>                                                                                                                       | 4  | 4.4 | 4   | 0.05                 | 0.73 <sup>y</sup><br>1.0 <sup>n</sup>                                                                                                                       |
| <i>rnh1Δrnh201Δrad1Δrad2Δ</i>   | 143 | 9  | 6.3  | 1.5 | 0.37                 | 0.01 <sup>y</sup><br>0.50 <sup>o</sup>                                                                                                                      | 5  | 3.5 | 3.2 | 0.06                 | 0.06 <sup>y</sup><br>1.0 <sup>o</sup>                                                                                                                       |
| <i>rnh1Δrnh201Δrad1Δapn1Δ</i>   | 112 | 7  | 6.3  | 1.5 | 0.45                 | 0.03 <sup>y</sup> , 0.81 <sup>d</sup><br>0.32 <sup>k</sup>                                                                                                  | 1  | 0.9 | 0.8 | 1                    | 1.0 <sup>y</sup> , 0.63 <sup>d</sup><br>1.0 <sup>k</sup>                                                                                                    |
| <i>rnh1Δrnh201Δrad2Δapn1Δ</i>   | 94  | 5  | 5.3  | 1.2 | 0.59                 | 0.02 <sup>y</sup> , 0.60 <sup>d</sup><br>0.32 <sup>l</sup>                                                                                                  | 2  | 2.1 | 1.9 | 0.33                 | 1.0 <sup>y</sup> , 1.0 <sup>d</sup><br>0.65 <sup>l</sup>                                                                                                    |
| <b>MMR genes</b>                |     |    |      |     |                      | f, to <i>mlh1Δ</i><br>g, to <i>mlh3Δ</i><br>h, to <i>msh2Δ</i><br>i, to <i>pms1Δ</i><br>j, to <i>mlh1Δmlh3Δ</i><br>z, to<br><i>rnh1Δrnh201ΔMLH1-wt(SK1)</i> |    |     |     |                      | f, to <i>mlh1Δ</i><br>g, to <i>mlh3Δ</i><br>h, to <i>msh2Δ</i><br>i, to <i>pms1Δ</i><br>j, to <i>mlh1Δmlh3Δ</i><br>z, to<br><i>rnh1Δrnh201ΔMLH1-wt(SK1)</i> |
| <i>msh2Δ</i>                    | 144 | 19 | 13.2 | 3.1 | 6.0X10 <sup>-4</sup> | -                                                                                                                                                           | 8  | 5.6 | 5.1 | 3.7X10 <sup>-3</sup> | -                                                                                                                                                           |
| <i>pms1Δ</i>                    | 144 | 9  | 6.3  | 1.5 | 0.37                 | -                                                                                                                                                           | 7  | 4.9 | 4.4 | 0.01                 | -                                                                                                                                                           |
| <i>mlh1Δ</i>                    | 192 | 14 | 7.3  | 1.7 | 0.13                 | -                                                                                                                                                           | 6  | 3.1 | 2.8 | 0.07                 | -                                                                                                                                                           |
| <i>mlh3Δ</i>                    | 150 | 12 | 8.0  | 1.9 | 0.10                 | -                                                                                                                                                           | 3  | 2.0 | 1.8 | 0.43                 | -                                                                                                                                                           |
| <i>mlh1Δmlh3Δ</i>               | 95  | 7  | 7.4  | 1.7 | 0.20                 | 1.0 <sup>f</sup><br>0.81 <sup>g</sup>                                                                                                                       | 0  | 0.0 | 0.0 | 0.59                 | 0.18 <sup>f</sup><br>0.28 <sup>g</sup>                                                                                                                      |
| <i>rnh1Δrnh201Δmsh2Δ</i>        | 238 | 30 | 12.6 | 2.9 | 1.0X10 <sup>-4</sup> | 0.48 <sup>y</sup><br>0.88 <sup>h</sup>                                                                                                                      | 18 | 7.6 | 6.9 | 1.0X10 <sup>-4</sup> | 1.0 <sup>y</sup><br>0.53 <sup>h</sup>                                                                                                                       |
| <i>rnh1Δrnh201Δpms1Δ</i>        | 143 | 16 | 11.2 | 2.6 | 4.4X10 <sup>-3</sup> | 0.33 <sup>y</sup><br>0.15 <sup>i</sup>                                                                                                                      | 13 | 9.1 | 8.3 | 1.0X10 <sup>-4</sup> | 0.03 <sup>y</sup><br>0.17 <sup>i</sup>                                                                                                                      |
| <i>rnh1Δrnh201Δmlh1Δ</i>        | 236 | 40 | 16.9 | 3.9 | 1.0X10 <sup>-4</sup> | 0.69 <sup>y</sup><br>3.2X10 <sup>-3f</sup>                                                                                                                  | 10 | 4.2 | 3.9 | 7.1X10 <sup>-3</sup> | 0.62 <sup>y</sup><br>0.62 <sup>f</sup>                                                                                                                      |
| <i>rnh1Δrnh201Δmlh3Δ</i>        | 136 | 6  | 4.4  | 1.0 | 1                    | 1.8X10 <sup>-3y</sup><br>0.23 <sup>g</sup>                                                                                                                  | 5  | 3.7 | 3.3 | 0.05                 | 0.78 <sup>y</sup><br>0.48 <sup>g</sup>                                                                                                                      |
| <i>rnh1Δrnh201Δmlh3-D523N</i>   | 143 | 10 | 7.0  | 1.6 | 0.27                 | 0.25 <sup>y</sup><br>0.30 <sup>z</sup>                                                                                                                      | 4  | 2.8 | 2.5 | 0.23                 | 1.0 <sup>y</sup><br>1.0 <sup>z</sup>                                                                                                                        |
| <i>rnh1Δrnh201ΔMLH3-wt(SK1)</i> | 144 | 16 | 11.1 | 2.6 | 4.6X10 <sup>-3</sup> | 0.33 <sup>y</sup>                                                                                                                                           | 4  | 2.8 | 2.5 | 0.23                 | 1.0 <sup>y</sup>                                                                                                                                            |
| <i>rnh1Δrnh201Δmlh1Δmlh3Δ</i>   | 142 | 18 | 12.7 | 2.9 | 1.1X10 <sup>-3</sup> | 0.63 <sup>y</sup><br>0.28 <sup>j</sup>                                                                                                                      | 3  | 2.1 | 1.9 | 0.40                 | 0.74 <sup>y</sup><br>0.28 <sup>j</sup>                                                                                                                      |
| <i>rnh1Δrnh201Δmlh1Δfcy1Δ</i>   | 140 | 14 | 10.0 | 2.3 | 0.02                 | 0.19 <sup>y</sup><br>0.43 <sup>f</sup> , 0.31 <sup>a</sup>                                                                                                  | 4  | 2.9 | 2.6 | 0.22                 | 1.1 <sup>y</sup><br>0.28 <sup>f</sup> , 0.24 <sup>a</sup>                                                                                                   |
| <i>rnh1Δrnh201Δmlh1Δapn1Δ</i>   | 112 | 11 | 9.8  | 2.3 | 0.03                 | 0.20 <sup>y</sup><br>0.52 <sup>f</sup> , 0.65 <sup>d</sup>                                                                                                  | 4  | 3.6 | 3.3 | 0.08                 | 1.0 <sup>y</sup><br>1.0 <sup>f</sup> , 0.70 <sup>d</sup>                                                                                                    |
| <i>rnh1Δrnh201Δmlh3Δfcy1Δ</i>   | 134 | 14 | 10.4 | 2.4 | 0.01                 | 0.25 <sup>y</sup><br>0.54 <sup>g</sup> , 0.31 <sup>a</sup>                                                                                                  | 5  | 3.7 | 3.4 | 0.05                 | 0.77 <sup>y</sup><br>0.48 <sup>g</sup> , 0.13 <sup>a</sup>                                                                                                  |
| <i>rnh1Δrnh201Δmlh3Δapn1Δ</i>   | 95  | 10 | 10.5 | 2.4 | 0.02                 | 0.36 <sup>y</sup><br>0.50 <sup>g</sup> , 0.49 <sup>d</sup>                                                                                                  | 1  | 1.0 | 0.9 |                      | 0.43 <sup>y</sup><br>1.0 <sup>g</sup> , 1.0 <sup>d</sup>                                                                                                    |
| <b>NHEJ/HR/SSA genes</b>        |     |    |      |     |                      | p, to <i>lif1Δ</i><br>q, to <i>rad51Δ</i>                                                                                                                   |    |     |     |                      | p, to <i>lif1Δ</i><br>q, to <i>rad51Δ</i>                                                                                                                   |

|                                      |     |    |      |     |                      | r, to <i>rad52Δ</i>                       |    |     |     |                      | r, to <i>rad52Δ</i>                    |  |
|--------------------------------------|-----|----|------|-----|----------------------|-------------------------------------------|----|-----|-----|----------------------|----------------------------------------|--|
| <i>lif1Δ</i> <sup>2</sup>            | 95  | 12 | 12.6 | 2.9 | 5.7X10 <sup>-3</sup> | -                                         | 6  | 6.3 | 5.7 | 4.8X10 <sup>-3</sup> | -                                      |  |
| <i>rad51Δ</i> <sup>2</sup>           | 187 | 18 | 9.6  | 2.2 | 0.02                 | -                                         | 4  | 2.1 | 1.9 | 0.29                 | -                                      |  |
| <i>rad52Δ</i> <sup>2</sup>           | 188 | 19 | 10.1 | 2.4 | 0.01                 | -                                         | 4  | 2.1 | 1.9 | 0.29                 | -                                      |  |
| <i>rnh1Δrnh201Δ</i><br><i>lif1Δ</i>  | 96  | 13 | 13.5 | 3.1 | 1.6X10 <sup>-3</sup> | 0.86 <sup>y</sup><br>1.0 <sup>p</sup>     | 2  | 2.1 | 1.9 | 0.35                 | 0.72 <sup>y</sup><br>0.19 <sup>p</sup> |  |
| <i>rnh1Δrnh201Δ</i><br><i>rad51Δ</i> | 96  | 12 | 12.5 | 2.9 | 5.9X10 <sup>-3</sup> | 0.60 <sup>y</sup><br>0.54 <sup>q</sup>    | 2  | 2.1 | 1.9 | 0.35                 | 0.72 <sup>y</sup><br>1.0 <sup>q</sup>  |  |
| <i>rnh1Δrnh201Δ</i><br><i>rad52Δ</i> | 168 | 27 | 16.1 | 3.7 | 1.0X10 <sup>-4</sup> | 1.0 <sup>y</sup><br>5.0X10 <sup>-4r</sup> | 11 | 6.5 | 6.0 | 5.0X10 <sup>-4</sup> | 0.14 <sup>y</sup><br>0.06 <sup>r</sup> |  |

1, Wild-type data are combined data from (1, 2); 2, Data are from (3); 3, 1T and 2T refer to YACs containing 1 terminator or 2 terminators, respectively. "Total rxns" means total reactions done (total number of clones checked). N/D in p-value column means the sample size (total rxns) is lower than 50 clones, therefore not enough to achieve statistical accuracy. Statistics by Fisher's exact test.

**Supplementary Table 5.** PCR analysis of *URA3* presence in FOA-resistant colonies.

| Strain                         | Presence of <i>URA3</i> |         | Total number of FOA <sup>R</sup> colonies <sup>1</sup> | Percent end loss (no <i>URA3</i> ) |
|--------------------------------|-------------------------|---------|--------------------------------------------------------|------------------------------------|
|                                | number                  | percent |                                                        |                                    |
| wild-type                      | 0                       | 0%      | 20                                                     | 100%                               |
| <i>rnh1Δrnh201Δ</i>            | 0                       | 0%      | 20                                                     | 100%                               |
| <i>fcy1Δ</i>                   | 0                       | 0%      | 30                                                     | 100%                               |
| <i>rnh1Δrnh201Δfcy1Δ</i>       | 0                       | 0%      | 20                                                     | 100%                               |
| <i>apn1Δ</i>                   | 0                       | 0%      | 18                                                     | 100%                               |
| <i>rnh1Δrnh201Δapn1Δ</i>       | 1                       | 5.5     | 18                                                     | 94.5%                              |
| <i>rnh1Δrnh201Δung1Δ</i>       | 0                       | 0%      | 20                                                     | 100%                               |
| <i>rnh1Δrnh201Δ apn1Δung1Δ</i> | 0                       | 0%      | 16                                                     | 100%                               |
| <i>rnh1Δrnh201Δ exo1Δung1Δ</i> | 0                       | 0%      | 20                                                     | 100%                               |
| <i>msh2Δ</i>                   | 8                       | 26.7%   | 30                                                     | 73.3%                              |
| <i>pms1Δ</i>                   | N/D                     | N/D     | N/D                                                    | N/D                                |
| <i>mlh1Δ</i>                   | 8                       | 26.7%   | 30                                                     | 73.3%                              |
| <i>mlh3Δ</i>                   | 2                       | 6.7%    | 30                                                     | 93.3%                              |
| <i>mlh1Δ mlh3Δ</i>             | 5                       | 16.7%   | 30                                                     | 83.3%                              |
| <i>rnh1Δrnh201Δmsh2Δ</i>       | 3                       | 10%     | 30                                                     | 90%                                |
| <i>rnh1Δrnh201Δpms1Δ</i>       | 1                       | 3.3%    | 30                                                     | 96.7%                              |
| <i>rnh1Δrnh201Δmlh1Δ</i>       | 6                       | 20%     | 30                                                     | 80%                                |
| <i>rnh1Δrnh201Δmlh3Δ</i>       | 1                       | 3.3%    | 30                                                     | 96.7%                              |
| <i>rnh1Δrnh201Δmlh1Δmlh3Δ</i>  | 4                       | 13.3%   | 30                                                     | 86.7%                              |
| <i>rnh1Δrnh201Δmlh1Δfcy1Δ</i>  | 0                       | 0%      | 30                                                     | 100%                               |
| <i>rnh1Δrnh201Δmlh3Δfcy1Δ</i>  | 0                       | 0%      | 29                                                     | 100%                               |
| <i>rnh1Δrnh201Δmlh3Δapn1Δ</i>  | 0                       | 0%      | 30                                                     | 100%                               |
| <i>rnh1Δrnh201Δrad1Δrad2Δ</i>  | 0                       | 0%      | 30                                                     | 100%                               |
| <i>rnh1Δrnh201Δrad14Δ</i>      | 0                       | 0%      | 30                                                     | 100%                               |

1, Only one FOA<sup>R</sup> colony per plate was tested, assuring that each event was independent (For 10-colony assays,

each culture plated on each FOA-Leu plate is from an individual parent colony). Highlighted area contains data for MMR defective mutants. PCR methods and primers used for checking *URA3* locus are listed in supplementary methods. Data is for the CAG-70 *URA3*-YAC.

**Supplementary Table 6.** Primers used in this study

| Locus                               | Primer name       | Oligonucleotide sequence   |
|-------------------------------------|-------------------|----------------------------|
| Cross CAG<br>(instability)          | NewCAGfor         | CCTCAGCCTGGCCGAAAGAAAAGAAA |
|                                     | NewCAGrev         | CAGTCACGACGTTGTAAAACGACGG  |
| Cross CAG<br>(qPCR)                 | T7-20B            | GAATTCGAGCTCCACCGCGG       |
|                                     | CTG rev2          | CCCAGGCCTCCAGTTTGC         |
| Cross G4T4<br>(qPCR)                | G4T4 right 65bp   | CCTGTCGTGCCAGTGTATAC       |
|                                     | G4T4 left 90bp    | GTGGCCAGGACCCAACGCTG       |
| URA3 internal 1<br>(qPCR)           | Yif5 CAG for      | GGGTCAACAGTATAGAACCGTG     |
|                                     | Yif5-CAG rev      | TCAAATATGCTTCCAGCCTGC      |
| MMR1 internal<br>(qPCR)             | MMR1 internal for | GCCCTAAGACTAGACTGGCAC      |
|                                     | MMR1 internal rev | GCAGAAGTTGGCTCCTCTTC       |
| ACT1 internal<br>(qPCR)             | ACT1for3          | TCCAGATGGTCAAGTCATCA       |
|                                     | ACT1rev3          | TCGGCAATACCTGGGAACAT       |
| URA3 internal 2<br>(check presence) | URA3 for2         | TGCTGCTACTCATCCTAG         |
|                                     | URA3 rev          | TCCAGCCTGCTTTTCTGTA        |

**Supplementary Table 7.** Yeast strains used in this study.

| Strain Number     | Strain Background | Genotype                                                                                                                                                                                                                                                                                                                                                                             | Reference  |
|-------------------|-------------------|--------------------------------------------------------------------------------------------------------------------------------------------------------------------------------------------------------------------------------------------------------------------------------------------------------------------------------------------------------------------------------------|------------|
| CFY1161<br>CFY765 | BY4705            | <i>MAT<math>\alpha</math></i> , <i>ade2<math>\Delta</math></i> :: <i>hisG</i> , <i>his3<math>\Delta</math>200</i> ; <i>leu2<math>\Delta</math></i> , <i>lys2<math>\Delta</math></i> ,<br><i>met15<math>\Delta</math></i> , <i>trp1<math>\Delta</math>63</i> , <i>ura3<math>\Delta</math></i> , <i>can<sup>R</sup></i> ; YAC: <i>ade3-2p</i> , <i>LEU2</i> , CAG-0,<br><i>URA3</i> ,  | (1, 2)     |
| CFY1162<br>CFY766 | BY4705            | <i>MAT<math>\alpha</math></i> , <i>ade2<math>\Delta</math></i> :: <i>hisG</i> , <i>his3<math>\Delta</math>200</i> , <i>leu2<math>\Delta</math></i> , <i>lys2<math>\Delta</math></i> ,<br><i>met15<math>\Delta</math></i> , <i>trp1<math>\Delta</math>63</i> , <i>ura3<math>\Delta</math></i> , <i>can<sup>R</sup></i> ; YAC: <i>ade3-2p</i> , <i>LEU2</i> ,<br>CAG-70, <i>URA3</i> , | (1, 2)     |
| CFY3620,<br>3621  | BY4705            | CFY765 <i>mh1<math>\Delta</math></i> :: <i>HisMX6</i>                                                                                                                                                                                                                                                                                                                                | This study |
| CFY3412           | BY4705            | CFY765 <i>mh201<math>\Delta</math></i> :: <i>TRP1</i>                                                                                                                                                                                                                                                                                                                                | This study |
| CFY3641           | BY4705            | CFY3620 <i>mh201<math>\Delta</math></i> :: <i>TRP1</i>                                                                                                                                                                                                                                                                                                                               | This study |
| CFY3036,<br>3037  | BY4705            | CFY766 <i>mh1<math>\Delta</math></i> :: <i>HisMX6</i>                                                                                                                                                                                                                                                                                                                                | This study |
| CFY3413           | BY4705            | CFY766 <i>mh201<math>\Delta</math></i> :: <i>TRP1</i>                                                                                                                                                                                                                                                                                                                                | This study |
| CFY3418,          | BY4705            | CFY3036 <i>mh201<math>\Delta</math></i> :: <i>TRP1</i>                                                                                                                                                                                                                                                                                                                               | This study |

|                        |        |                               |            |
|------------------------|--------|-------------------------------|------------|
| 3419                   |        |                               |            |
| CFY3684,<br>3685       | BY4705 | CFY765 <i>fcy1Δ::natNT2</i>   | This study |
| CFY3686,<br>3687       | BY4705 | CFY3641 <i>fcy1Δ::natNT2</i>  | This study |
| CFY3655,<br>3656       | BY4705 | CFY766 <i>fcy1Δ::natNT2</i>   | This study |
| CFY3657,<br>3658       | BY4705 | CFY3618 <i>fcy1Δ::natNT2</i>  | This study |
| CFY3701,<br>3702       | BY4705 | CFY766 <i>cdd1Δ::HPH</i>      | This study |
| CFY3703,<br>3704       | BY4705 | CFY3418 <i>cdd1Δ::HPH</i>     | This study |
| CFY3705,<br>3706       | BY4705 | CFY3657 <i>cdd1Δ::HPH</i>     | This study |
| CFY3707                | BY4705 | CFY766 <i>ung1Δ::KanMX6</i>   | This study |
| CFY3916                | BY4705 | CFY766 <i>apn1Δ::KanMX6</i>   | This study |
| CFY3866,<br>3867       | BY4705 | CFY766 <i>exo1Δ:: KanMX6</i>  | This study |
| CFY3708,<br>3709       | BY4705 | CFY3418 <i>ung1Δ::HPH</i>     | This study |
| CFY3863,<br>3874       | BY4705 | CFY3418 <i>apn1Δ::KanMX6</i>  | This study |
| CFY3868,<br>3869       | BY4705 | CFY3148 <i>exo1Δ:: KanMX6</i> | This study |
| CFY3864,<br>3875       | BY4705 | CFY3708 <i>apn1Δ::KanMX6</i>  | This study |
| CFY3870,<br>3871       | BY4705 | CFY3708 <i>exo1Δ::KanMX6</i>  | This study |
| CFY3715,<br>3716       | BY4705 | CFY766 <i>msh2Δ::KanMX6</i>   | This study |
| CFY3855,<br>3856       | BY4705 | CFY766 <i>pms1Δ::KanMX6</i>   | This study |
| CFY3752,<br>3753, 3754 | BY4705 | CFY766 <i>mlh1Δ::natNT2</i>   | This study |
| CFY3933,<br>3934       | BY4705 | CFY766 <i>mlh3Δ::KanMX6</i>   | This study |
| CFY3939                | BY4705 | CFY3752 <i>mlh3Δ::KanMX6</i>  | This study |
| CFY3719,<br>3720       | BY4705 | CFY3418 <i>msh2Δ::KanMX6</i>  | This study |
| CFY3797,               | BY4705 | CFY3418 <i>pms1Δ::KanMX6</i>  | This study |

|                        |        |                                                     |            |
|------------------------|--------|-----------------------------------------------------|------------|
| 3824, 3825             |        |                                                     |            |
| CFY3755,<br>3756, 3757 | BY4705 | CFY3418 <i>mlh1Δ::natNT2</i>                        | This study |
| CFY3935,<br>3936       | BY4705 | CFY3418 <i>mlh3Δ::KanMX6</i>                        | This study |
| CFY4005,<br>4006       | BY4705 | CFY3418 <i>mlh3Δ::natNT2</i>                        | This study |
| CFY3937,<br>3938       | BY4705 | CFY3755 <i>mlh3Δ::KanMX6</i>                        | This study |
| CFY3758,<br>3759       | BY4705 | CFY3757 <i>fcy1Δ::KanMX6</i>                        | This study |
| CFY4000,<br>4001, 4002 | BY4705 | CFY3657 <i>mlh3Δ::KanMX6</i>                        | This study |
| CFY4029,<br>4030       | BY4705 | CFY4005 <i>mlh3Δ:: natNT2::SK1-mlh3D523N-KanMX6</i> | This study |
| CFY4027,<br>4028       | BY4705 | CFY4005 <i>mlh3::NAT::SK1-MLH3wt-KanMX6</i>         | This study |
| CFY3876                | BY4705 | CFY3757 <i>apn1Δ::KanMX6</i>                        | This study |
| CFY4123,<br>4124       | BY4705 | CFY3935 <i>apn1Δ::HPH</i>                           | This study |
| CFY3809                | BY4705 | CFY766 <i>rad1Δ::HPH</i>                            | This study |
| CFY3710                | BY4705 | CFY766 <i>rad2Δ::KanMX6</i>                         | This study |
| CFY3961                | BY4705 | CFY766 <i>rad14Δ::KanMX6</i>                        | This study |
| CFY4046,<br>4047       | BY4705 | CFY3418 <i>rad26Δ::KanMX6</i>                       | This study |
| CFY3841,<br>3842       | BY4705 | CFY3710 <i>rad1Δ::HPH</i>                           | This study |
| CFY3839,<br>3840       | BY4705 | CFY3418 <i>rad1Δ::HPH</i>                           | This study |
| CFY3688                | BY4705 | CFY3418 <i>rad2Δ::KanMX6</i>                        | This study |
| CFY3843,<br>3844, 3845 | BY4705 | CFY3688 <i>rad1Δ::HPH</i>                           | This study |
| CFY4309                | BY4705 | CFY3688 <i>apn1Δ::HPH</i>                           | This study |
| CFY4311,<br>4312       | BY4705 | CFY3683 <i>rad1Δ::HPH</i>                           | This study |
| CFY3962                | BY4705 | CFY3418 <i>rad14Δ::KanMX6</i>                       | This study |
| CFY4048,<br>4049       | BY4705 | CFY3418 <i>rad26Δ::KanMX6</i>                       | This study |
| CFY2920,<br>2921       | BY4705 | CFY1162 <i>lif1Δ::His3MX6</i>                       | (3)        |
| CFY3798                | BY4705 | CFY3418 <i>lif1Δ::KanMX6</i>                        | This study |

|                        |        |                                                                                                                                                      |            |
|------------------------|--------|------------------------------------------------------------------------------------------------------------------------------------------------------|------------|
| CFY3659,<br>3660       | BY4705 | CFY3418 <i>rad51Δ::natNT2</i>                                                                                                                        | This study |
| CFY3730                | BY4705 | CFY3730 <i>rad52Δ::KanMX6</i>                                                                                                                        | This study |
| CFY3555                | BY4705 | <i>MATα, ade2Δ:: hisG, his3Δ200, leu2Δ0, lys2Δ0, met15Δ0, trp1Δ63, ura3Δ0, can<sup>R</sup></i> ; YAC: <i>ade3-2p, LEU2, CAG-70-Tcyc1 –URA3</i>       | This study |
| CFY3580                | BY4705 | <i>MATα, ade2Δ:: hisG, his3Δ200, leu2Δ0, lys2Δ0, met15Δ0, trp1Δ63, ura3Δ0, can<sup>R</sup></i> ; YAC: <i>ade3-2p, LEU2, Ttef1-CAG-70-Tcyc1 –URA3</i> | This study |
| CFY3644,<br>3645       | BY4705 | CFY3555 <i>rnh1Δ::HisMX6, rnh201Δ::TRP1</i>                                                                                                          | This study |
| CFY3646                | BY4705 | CFY3580 <i>rnh1Δ::HisMX6, rnh201Δ::TRP1</i>                                                                                                          | This study |
| CFY3801                | BY4705 | CFY766 Fcy1-1Myc/KanMX6                                                                                                                              | This study |
| CFY3803,<br>3804       | BY4705 | CFY3418 Fcy1-1Myc/KanMX6                                                                                                                             | This study |
| CFY3966,<br>3967, 3968 | BY4705 | CFY3580 Fcy1-1Myc/KanMX6                                                                                                                             | This study |
| CFY3807,<br>3808       | BY4705 | CFY3646 Fcy1-1Myc/KanMX6                                                                                                                             | This study |

## References

1. Kerrest A, *et al.* (2009) SRS2 and SGS1 prevent chromosomal breaks and stabilize triplet repeats by restraining recombination. *Nat Struct Mol Biol* 16(2):159-167.
2. Sundararajan R, Gellon L, Zunder RM, & Freudenreich CH (2010) Double-strand break repair pathways protect against CAG/CTG repeat expansions, contractions and repeat-mediated chromosomal fragility in *Saccharomyces cerevisiae*. *Genetics* 184(1):65-77.
3. Su XA, Dion V, Gasser SM, & Freudenreich CH (2015) Regulation of recombination at yeast nuclear pores controls repair and triplet repeat stability. *Genes Dev* 29(10):1006-1017.
